# Supplementary material for: Rocking- and diffusion-based culture of tumor spheroids-on-a-chip
Source: Royal Society of Chemistry journal article supplement (doi:10.1039/d3lc01116j), 2024-01-01
Supplement: d3lc01116j1.pdf [file d3lc01116j1.pdf]

## Supplementary Information

### Rocking- and diffusion-based culture of tumor spheroids on a chip

Duomei Tian<sup>1,a</sup>, Zheng Mao<sup>1,a</sup>, Li Wang<sup>b</sup>, Xiaochen Huang<sup>a</sup>, Wei Wang<sup>a</sup>, Haoyue Luo<sup>a</sup>,  
Juan Peng<sup>\*,a</sup>, Yong Chen<sup>\*,a</sup>

École Normale Supérieure-PSL Research University, Département de Chimie, Sorbonne Universités-UPMC  
Univ Paris 06, CNRS UMR 8640, PASTEUR, 24, rue Lhomond, 75005 Paris, France

*E-mail* : [yong.chen@ens.psl.eu](mailto:yong.chen@ens.psl.eu), [juan.wang@ens.psl.eu](mailto:juan.wang@ens.psl.eu)



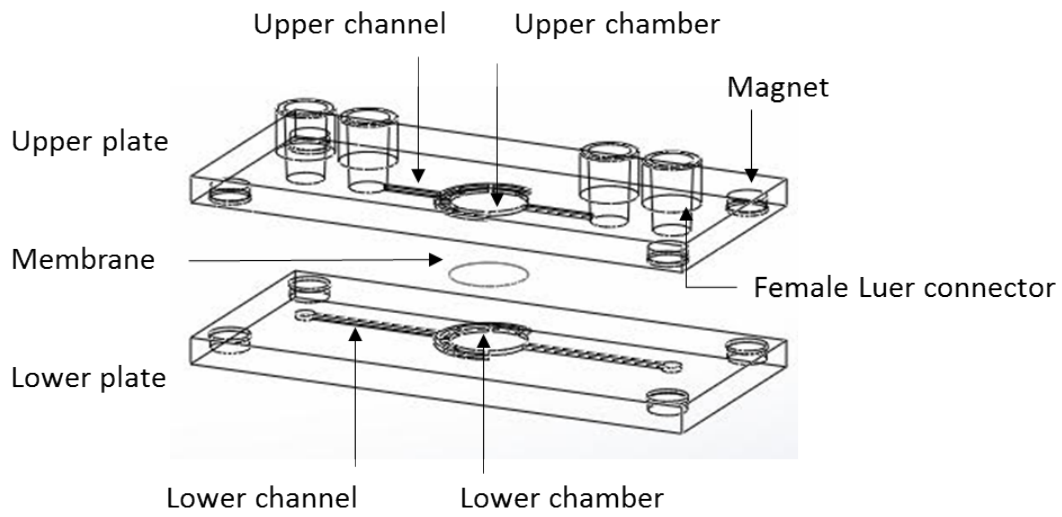

Figure S1. Schematic view of the microfluidic device for organ-on-a-chip applications.

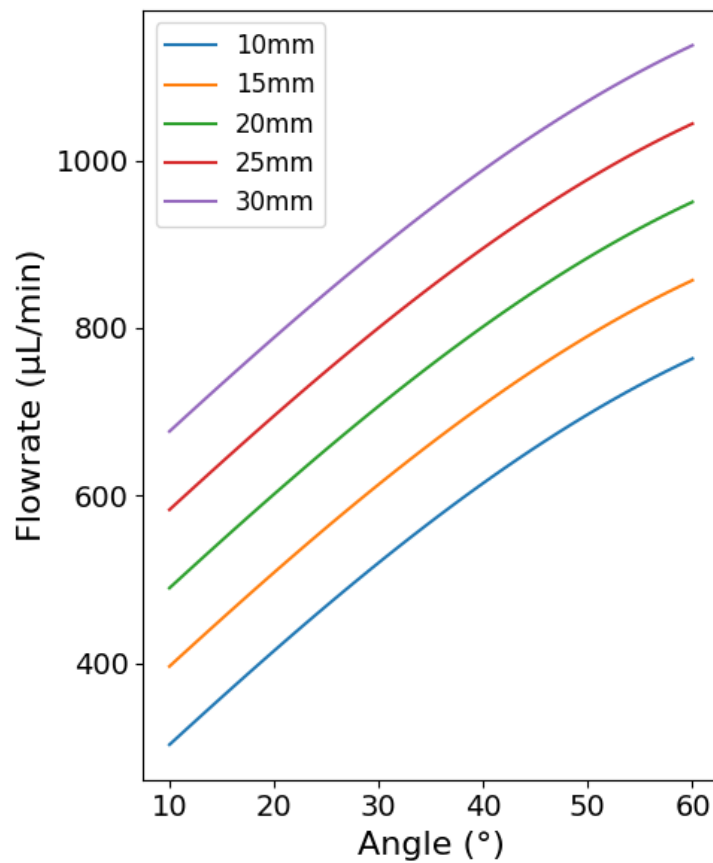

Figure S2. Calculated flowrate as a function of tilt angle of the chip in a rocking system for different heights of liquid injection in the left-side syringe tube.

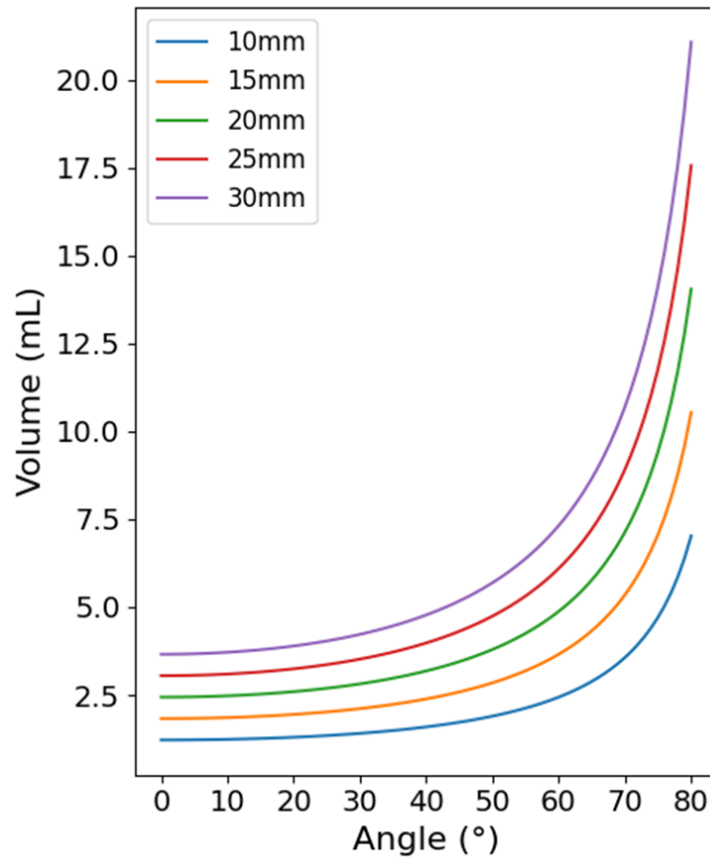

Figure S3. Calculated volume of the injected liquid in a syringe tube of 12.64 mm diameter as a function of tilt angle of the chip in a rocking system for different heights of liquid injection.

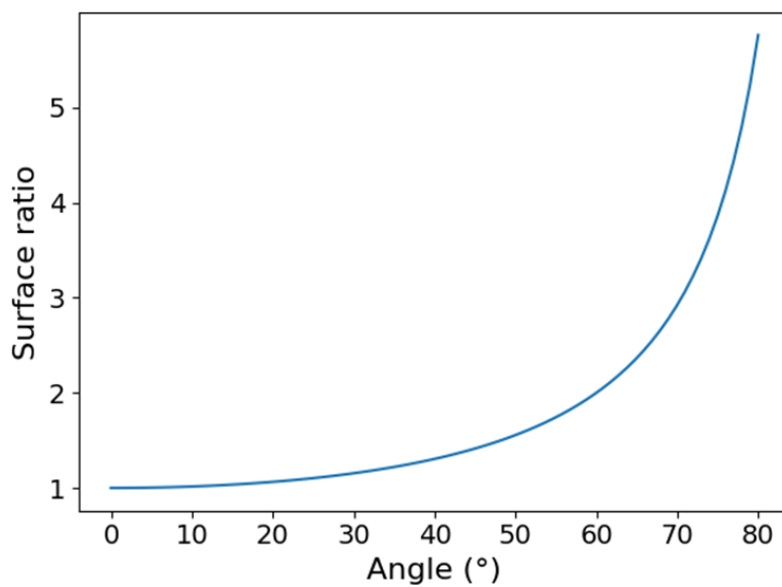

Figure S4. Surface ratio of the liquid in a syringe tube with and without chip tilting in a rocking system.

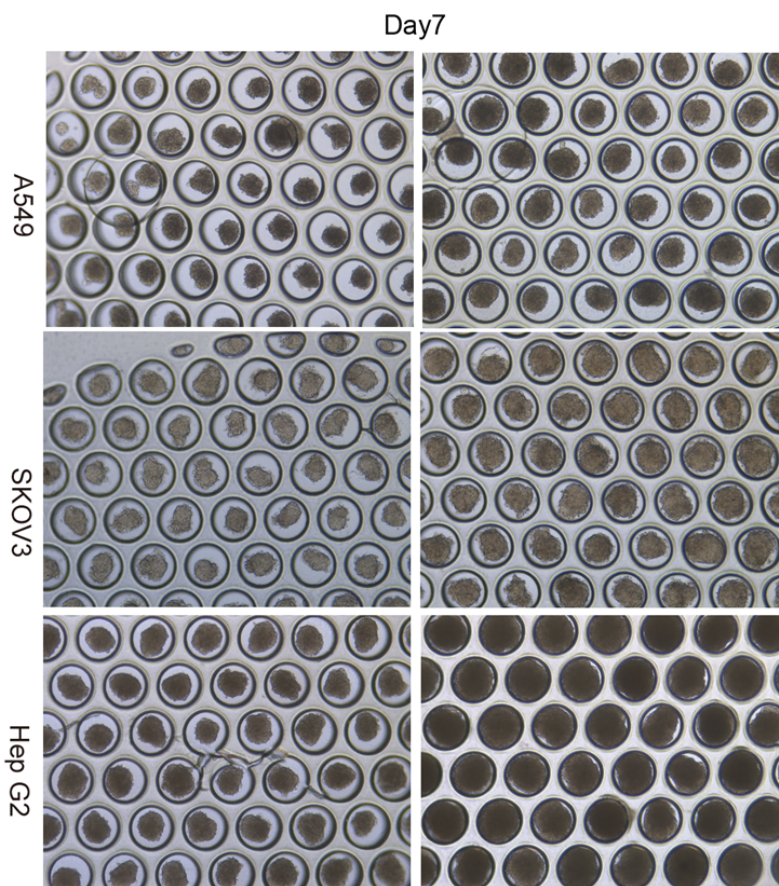

Figure S5. Microphotograph images of three types of tumor spheroids (HepG2, SKOV3, and A549) in 250  $\mu\text{m}$  diameter hydrogel microwells of a thin membrane, cultured for 7 days under two different conditions.

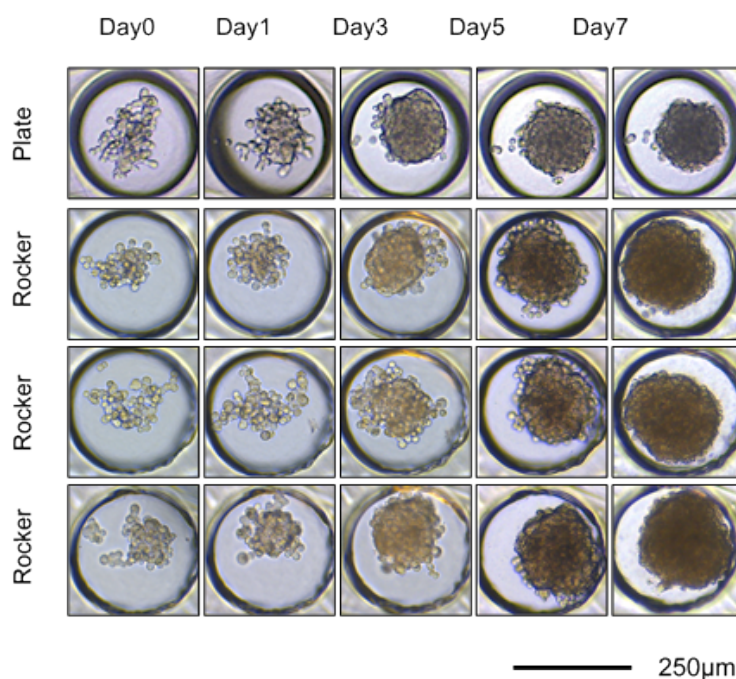

Figure S6. Growth behaviors of A549 tumor spheroids in 250  $\mu\text{m}$  diameter hydrogel microwells of a thin

membrane, cultured under two different conditions and imaged on days 0, 1, 3, 5 and 7.
